# Supplementary material for: Solvent effects on isolated formamide and its monohydrated complex: observations from PCM study
Source: Royal Society of Chemistry journal article supplement (doi:10.1039/b902149c), 2009-01-01
Supplement: b902149c.pdf [file b902149c.pdf]

**Table S1 Geometrical parameters (bond length, in Å, bond angle, in deg) and vibrational stretching frequencies( $\text{cm}^{-1}$ )<sup>a</sup> for formamide in the isolated monomer (I) and in the monohydrated complex (II) in gas phase and in six kinds of solvents, calculated at B3LYP/6-311++G(d,p) level of theory and some corresponding experimental values<sup>b</sup>**

| Parameters \ Solvents      | GAS    |        |                     | CCl4   |        |                   | THF    |        | ETH    |        | ACN    |        |                   | DMSO   |        | WAT    |        |
|----------------------------|--------|--------|---------------------|--------|--------|-------------------|--------|--------|--------|--------|--------|--------|-------------------|--------|--------|--------|--------|
|                            | I      | II     | Exp                 | I      | II     | Exp               | I      | II     | I      | II     | I      | II     | Exp               | I      | II     | I      | II     |
| $R_{\text{N1-H2}}$         | 1.010  | 1.017  | 1.0016 <sup>c</sup> | 1.011  | 1.017  |                   | 1.013  | 1.016  | 1.014  | 1.016  | 1.014  | 1.016  |                   | 1.014  | 1.016  | 1.014  | 1.016  |
| $R_{\text{N1-H9}}$         | 1.007  | 1.006  | 1.0015 <sup>c</sup> | 1.009  | 1.008  |                   | 1.011  | 1.011  | 1.012  | 1.012  | 1.012  | 1.012  |                   | 1.012  | 1.012  | 1.012  | 1.012  |
| $R_{\text{C3-H4}}$         | 1.106  | 1.103  | 1.098 <sup>c</sup>  | 1.105  | 1.102  |                   | 1.104  | 1.101  | 1.104  | 1.101  | 1.104  | 1.101  |                   | 1.104  | 1.101  | 1.103  | 1.101  |
| $R_{\text{C3=O5}}$         | 1.212  | 1.223  | 1.219 <sup>c</sup>  | 1.218  | 1.228  |                   | 1.223  | 1.232  | 1.226  | 1.234  | 1.226  | 1.234  |                   | 1.226  | 1.234  | 1.227  | 1.234  |
| $R_{\text{C3-N1}}$         | 1.361  | 1.349  | 1.352 <sup>c</sup>  | 1.354  | 1.346  |                   | 1.348  | 1.342  | 1.346  | 1.340  | 1.345  | 1.340  |                   | 1.345  | 1.340  | 1.345  | 1.340  |
| $\alpha_{\text{H2-N1-C3}}$ | 119.4  | 119.1  | 118.5 <sup>c</sup>  | 119.9  | 119.3  |                   | 120.3  | 119.6  | 120.6  | 119.7  | 120.6  | 119.8  |                   | 120.6  | 119.8  | 120.6  | 119.8  |
| $\alpha_{\text{N1-C3=O5}}$ | 124.9  | 125.0  | 124.7 <sup>c</sup>  | 125.0  | 124.9  |                   | 125.1  | 124.8  | 125.2  | 124.8  | 125.2  | 124.8  |                   | 125.1  | 124.8  | 125.1  | 124.8  |
| $\alpha_{\text{N1-C3-H4}}$ | 112.4  | 113.6  | 112.7 <sup>c</sup>  | 112.6  | 113.7  |                   | 112.8  | 113.8  | 112.9  | 113.9  | 112.9  | 113.9  |                   | 112.9  | 113.9  | 112.9  | 113.9  |
| $\tau_{\text{H7O6H8H2}}$   | –      | -143.5 |                     | –      | -137.1 |                   | –      | -131.3 | –      | -128.1 | –      | -127.5 |                   | –      | -127.2 | –      | -127.1 |
| $\nu_{\text{asN-H}}$       | 3577.1 | 3553.4 | 3570 <sup>d</sup>   | 3543.8 | 3524.0 | 3533 <sup>e</sup> | 3505.3 | 3493.9 | 3490.6 | 3482.7 | 3488.0 | 3480.5 | 3471 <sup>f</sup> | 3487.1 | 3479.7 | 3485.4 | 3477.8 |
| $\nu_{\text{sN-H}}$        | 3445.1 | 3348.2 | 3448 <sup>d</sup>   | 3415.9 | 3349.3 | 3411 <sup>e</sup> | 3382.3 | 3350.3 | 3370.3 | 3349.5 | 3368.0 | 3349.2 | 3357 <sup>f</sup> | 3367.2 | 3349.0 | 3365.7 | 3348.0 |
| $\nu_{\text{C3-H4}}$       | 2833.5 | 2868.8 | 2855 <sup>d</sup>   | 2847.2 | 2877.7 |                   | 2856.3 | 2884.4 | 2859.3 | 2886.9 | 2859.8 | 2886.9 |                   | 2859.7 | 2887.0 | 2860.4 | 2887.4 |
| $\nu_{\text{C3=O5}}$       | 1725.1 | 1695.1 | 1754 <sup>d</sup>   | 1688.8 | 1669.1 |                   | 1657.1 | 1644.5 | 1644.4 | 1634.6 | 1642.5 | 1633.3 |                   | 1641.5 | 1632.7 | 1639.9 | 1630.9 |
| $\nu_{\text{C3-N1}}$       | 1216.5 | 1265.5 | 1255 <sup>d</sup>   | 1225.4 | 1266.2 |                   | 1234.1 | 1266.4 | 1237.1 | 1266.6 | 1237.6 | 1266.4 |                   | 1238.0 | 1266.5 | 1238.1 | 1266.1 |

<sup>a</sup> Frequencies scaled by 0.963.<sup>9</sup> I denotes the monomer; II denotes the complex. <sup>b</sup> Experimental values correspond to isolated formamide. <sup>c</sup> From ref.2. <sup>d</sup> From ref.10. <sup>e</sup> From ref.11. <sup>f</sup> From ref.12.

**Table S2 GIAO B3LYP/aug-cc-pVTZ calculated  $^1\text{H}$  NMR chemical shifts ( $\delta_{\text{H}}$ , in ppm) and variations of  $^1\text{H}$  chemical shifts upon solvation ( $\Delta\delta_{\text{H}}(\text{sol-gas})$ , in ppm) <sup>a</sup> and upon complexation ( $\Delta\delta_{\text{H}}(\text{II-I})$ , in ppm) <sup>b</sup> in gas phase and in the six selected solvents within the framework of the IEF-PCM model for formamide in the isolated monomer (I) and in the complex (II) <sup>c</sup>, using the geometries optimized at the B3LYP/6-311++G(d,p) level.**

| Solvent | $\delta_{\text{H9}}$ |      | $\Delta\delta_{\text{H9}}(\text{sol-gas})$ |      | $\Delta\delta_{\text{H9}}(\text{II-I})$ | $\delta_{\text{H4}}$ |      | $\Delta\delta_{\text{H4}}(\text{sol-gas})$ |      | $\Delta\delta_{\text{H4}}(\text{II-I})$ | $\delta_{\text{H2}}$ |      | $\Delta\delta_{\text{H2}}(\text{sol-gas})$ |       | $\Delta\delta_{\text{H2}}(\text{II-I})$ |
|---------|----------------------|------|--------------------------------------------|------|-----------------------------------------|----------------------|------|--------------------------------------------|------|-----------------------------------------|----------------------|------|--------------------------------------------|-------|-----------------------------------------|
|         | I                    | II   | I                                          | II   | II-I                                    | I                    | II   | I                                          | II   | II-I                                    | I                    | II   | I                                          | II    | II-I                                    |
| GAS     | 4.81                 | 4.99 | 0.00                                       | 0.00 | 0.18                                    | 8.53                 | 8.48 | 0.00                                       | 0.00 | -0.05                                   | 4.79                 | 7.47 | 0.00                                       | 0.00  | 2.68                                    |
| CCl4    | 5.27                 | 5.45 | 0.46                                       | 0.46 | 0.18                                    | 8.55                 | 8.52 | 0.02                                       | 0.03 | -0.03                                   | 5.14                 | 7.39 | 0.35                                       | -0.08 | 2.25                                    |
| THF     | 5.72                 | 5.89 | 0.91                                       | 0.90 | 0.17                                    | 8.57                 | 8.55 | 0.03                                       | 0.07 | -0.02                                   | 5.45                 | 7.23 | 0.66                                       | -0.24 | 1.78                                    |
| ETH     | 5.89                 | 6.06 | 1.07                                       | 1.07 | 0.18                                    | 8.58                 | 8.56 | 0.05                                       | 0.08 | -0.01                                   | 5.56                 | 7.14 | 0.78                                       | -0.33 | 1.58                                    |
| ACN     | 5.91                 | 6.09 | 1.10                                       | 1.10 | 0.18                                    | 8.58                 | 8.57 | 0.05                                       | 0.08 | -0.01                                   | 5.58                 | 7.13 | 0.79                                       | -0.35 | 1.54                                    |
| DMSO    | 5.93                 | 6.10 | 1.12                                       | 1.11 | 0.18                                    | 8.58                 | 8.57 | 0.05                                       | 0.09 | -0.01                                   | 5.59                 | 7.13 | 0.80                                       | -0.34 | 1.54                                    |
| WAT     | 5.95                 | 6.12 | 1.14                                       | 1.13 | 0.17                                    | 8.59                 | 8.57 | 0.05                                       | 0.09 | -0.01                                   | 5.61                 | 7.11 | 0.82                                       | -0.37 | 1.50                                    |

<sup>a</sup>  $\Delta\delta_{\text{H}}(\text{sol-gas}) = \delta_{\text{H}}(\text{in a given solution}) - \delta_{\text{H}}(\text{in gas phase})$ .

<sup>b</sup>  $\Delta\delta_{\text{H}}(\text{II-I}) = \delta_{\text{H}}(\text{in the complex}) - \delta_{\text{H}}(\text{in the monomer})$ .

<sup>c</sup> Chemical shifts calculated are referred to TMS.

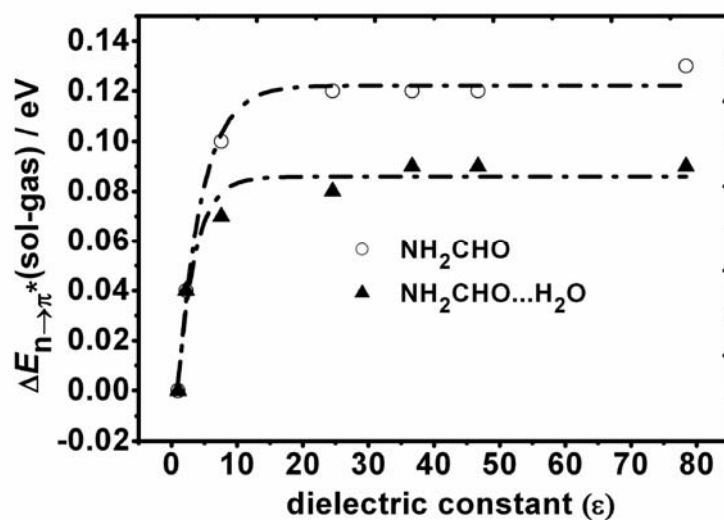

**Fig. S1** Dependences of variations in  $n \rightarrow \pi^*$  transition energies of formamide upon solvation ( $\Delta E_{n \rightarrow \pi^*}(\text{sol-gas})$ ) on dielectric constants of solvents ( $\epsilon$ ) in the monomer and the complex, derived from TDDFT calculations.
